# Supplementary material for: Loxin Reduced the Inflammatory Response in the Liver and the Aortic Fatty Streak Formation in Mice Fed with a High-Fat Diet
Source: MDPI journal article supplement (doi:10.3390/ijms23137329), 2022-06-30
Supplement: s1 [file s1]

**Supplementary materials:**

**Table S1.** Biochemical characteristics from ND and HFD animals.

|                 | ND       | NFD     | ND        | NFD    |
|-----------------|----------|---------|-----------|--------|
|                 | Ado-null |         | Ado-LOXIN |        |
| Glucose (mg/dL) | 110±9.0  | 162±9*  | 100±1.0   | 152±9* |
| TC (mg/dL)      | 125±10   | 160±12* | 115±1.0   | 174±8* |
| TG (mg/dL)      | 97±2.9   | 100±5   | 99±2.0    | 95±5   |
| HDL-C (mg/dL)   | 20±3.0   | 21±4    | 19±2.0    | 18±3   |
| ALT (UI)        | 51±2.0   | 91±3*   | 60±6.0    | 75±5** |
| AST (UI)        | 45±1.0   | 86±1*   | 50±2.0    | 75±5** |

Data are expressed as mean± SEM. TC, total cholesterol; TG, triglycerides; HDL, high-density lipoprotein; ALT, alanine aminotransferase; AST, aspartate aminotransferase; \* p < 0,05 vs ND. \*\* p < 0,02 vs HFD Ado-null.
